# Supplementary material
Source: bioRxiv or medRxiv preprint supplement (https://www.biorxiv.org/highwire/filestream/61194/field_highwire_adjunct_files/0/200790-1.pdf)
Supplement: Supplementary file [file 200790-1.pdf]

**Costello M. et. al - Characterization and remediation of sample index swaps by non-redundant dual indexing on massively parallel sequencing platforms**

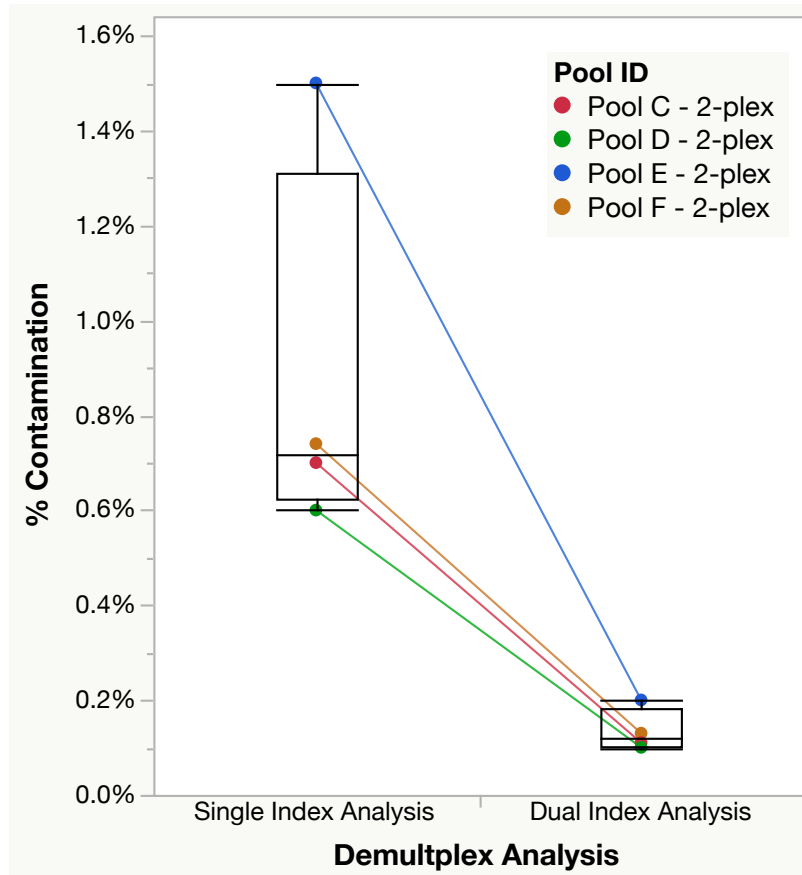

**Supplemental Figure 1: Initial testing of single vs dual indexed sequencing on HiSeq.** For four pools of 2 libraries, both the i7 and i5 indexes were read. Demultiplexing was then performed two ways, once using just the i7 single index and again using both the i7 and i5 dual indexes. The % contamination rate decreased dramatically when dual indexing demultiplexing was performed.

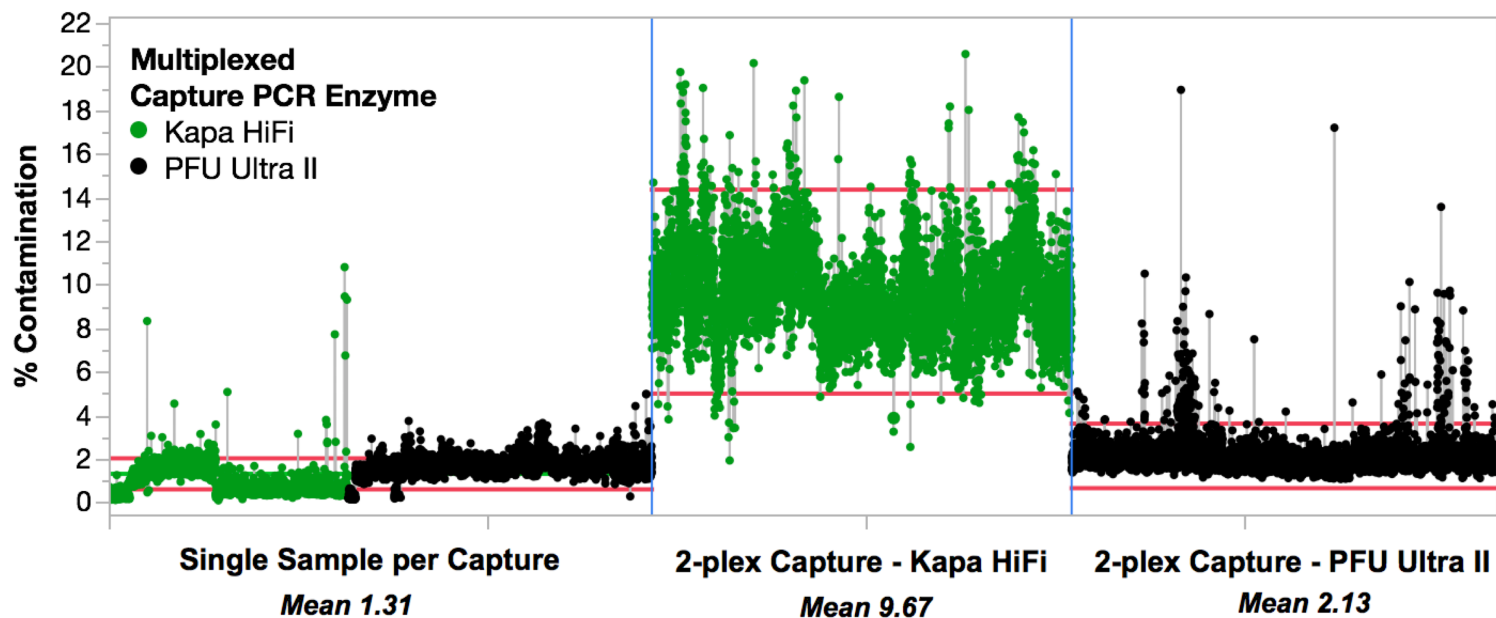

**Supplemental Figure 2: Previous experience with index swapping during exome capture library preparation (previously unpublished data).** Contamination rates for Agilent Sure Select exome capture libraries from 2013 sequenced on HiSeq 2500 (non-ExAmp reagents). We observed a spike in sample contamination when we began to 2-plex our libraries prior to exome hybridization and capture, and saw difference in the severity of the contamination when using different PCR enzymes (Kapa HiFi or PFU Ultra II) during the post-capture multiplex PCR amplification. This demonstrates that index swapping can occur anytime samples are amplified together, not just during ExAmp sequencing chemistry.
